# Supplementary material for: Phase Ib study of pevonedistat, a NEDD8-activating enzyme inhibitor, in combination with docetaxel, carboplatin and paclitaxel, or gemcitabine, in patients with advanced solid tumors
Source: PubMed Central journal article supplement (PMC6510847; doi:10.1007/s10637-018-0610-0), 2018-05-21

**a**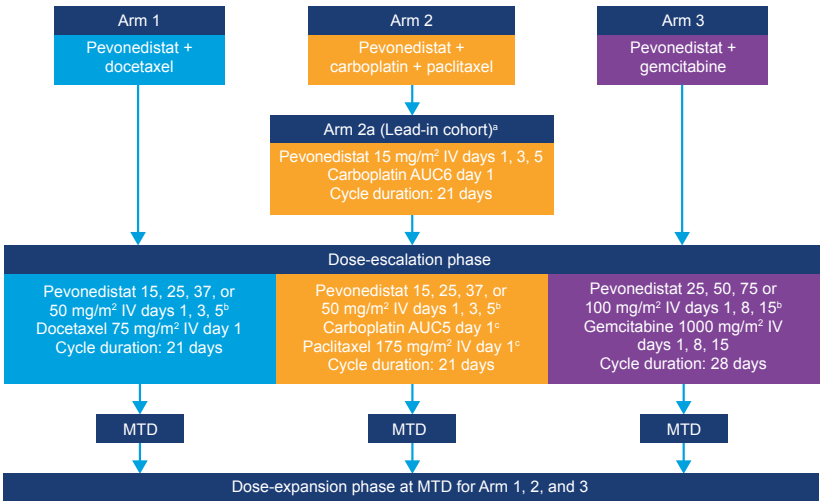**b**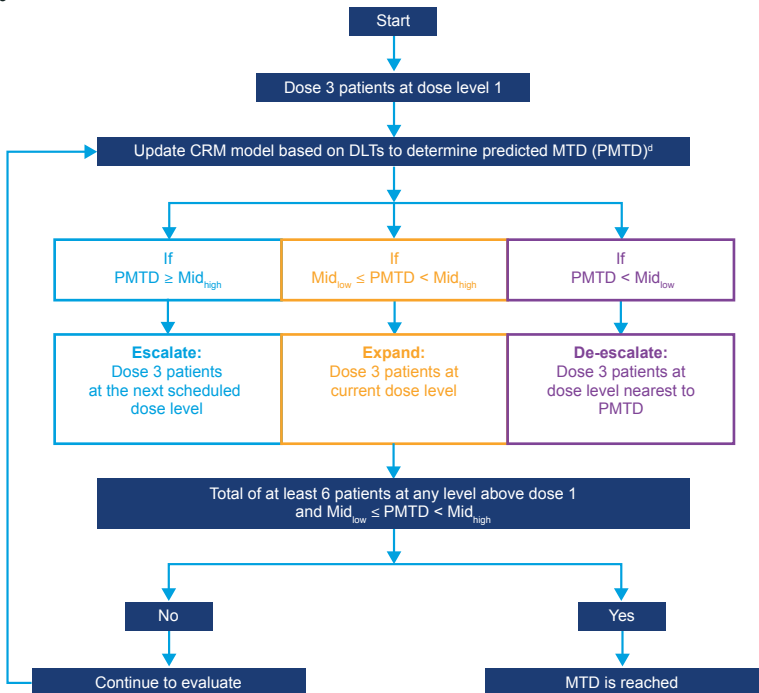

Supplement: 10637_2018_610_MOESM2_ESM.pdf [file 10637_2018_610_MOESM2_ESM.pdf]
